# Supplementary material for: Competitive oxidation and ubiquitylation on the evolutionarily conserved cysteine confer tissue-specific stabilization of Insig-2
Source: PubMed Central journal article supplement (PMC6969111; doi:10.1038/s41467-019-14231-w), 2020-01-17
Supplement: 41467_2019_14231_MOESM1_ESM.pdf [file 41467_2019_14231_MOESM1_ESM.pdf]

## Supplementary Information

Competitive oxidation and ubiquitylation on the evolutionarily conserved  
cysteine confer tissue-specific stabilization of Insig-2

Zhou *et al.*

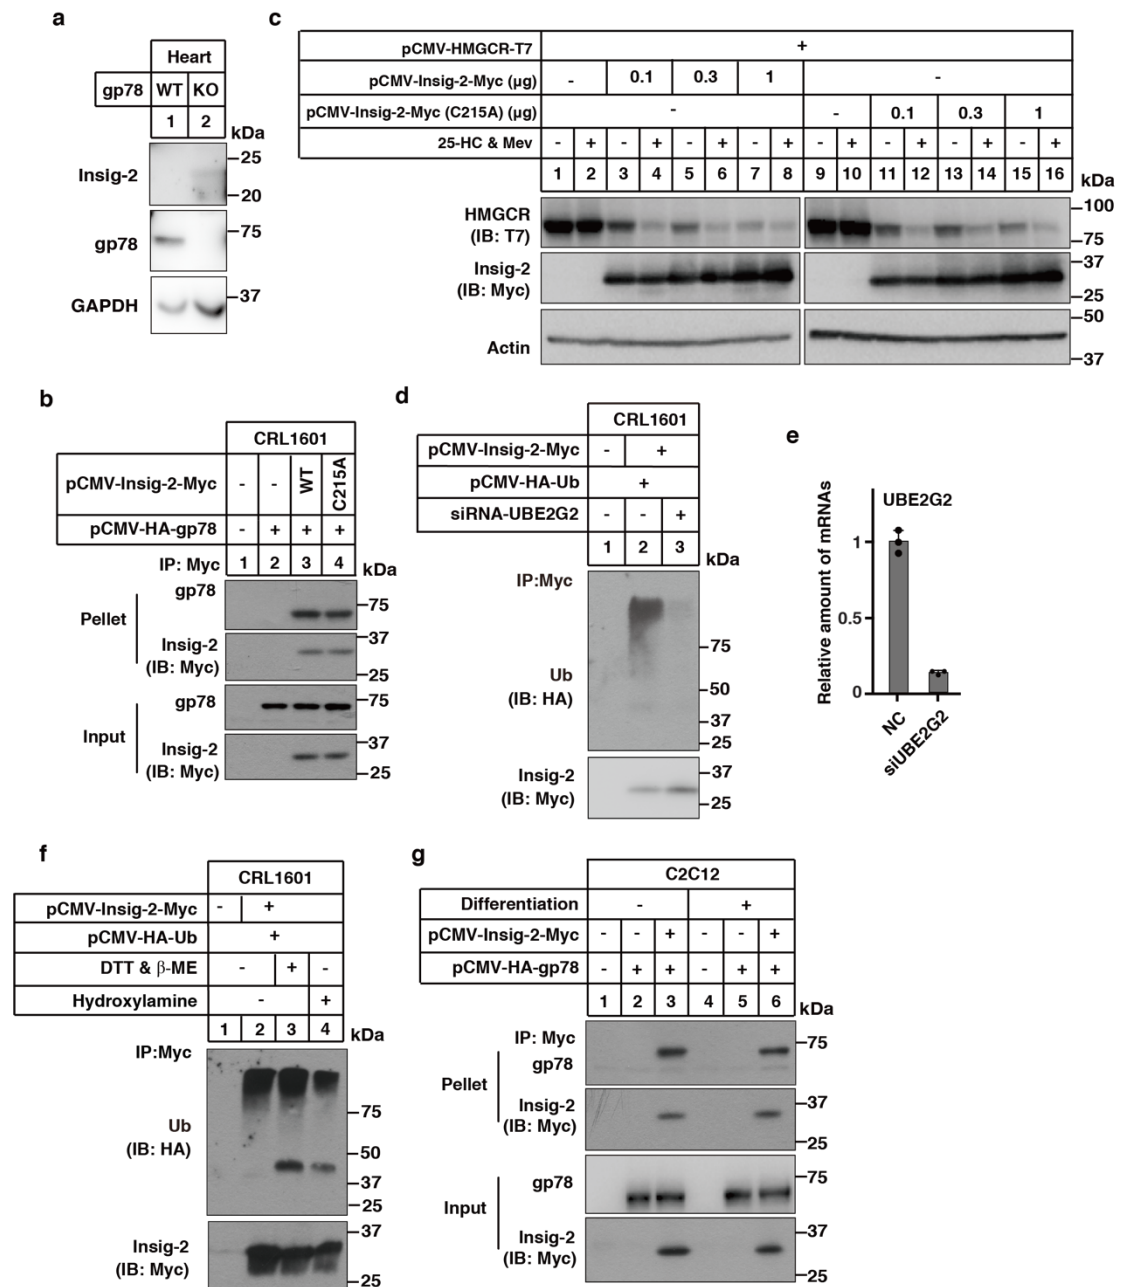

### Supplementary Figure 1. Characterization of Insig-2.

(a) Expression of indicated proteins in heart of WT and gp78 KO mice. (b) CRL1601 cells were transfected with indicated plasmids. Cells were then harvested for co-immunoprecipitation (IP) analysis with the anti-Myc coupled agarose beads. (c) The cells were transfected with indicated plasmids, depleted of lipids and treated with 25-HC (1  $\mu$ g/ml) and mevalonate (10 mM) for 5 h. Cells were harvested for immunoblotting analysis. (d) CRL1601 cells were transfected with indicated plasmids

and siRNAs, and treated with 10  $\mu$ M MG132 for 5 h. Cells were harvested for ubiquitylation assay. (e) Knock-down efficiency of UBE2G2 (n=3 biologically independent samples per condition, bars in black). (f) CRL1601 cells were transfected with indicated plasmids and treated with 10  $\mu$ M MG132 for 5 h. Cells were harvested, lysed in denaturing IP buffer followed by incubation with the anti-Myc beads. Precipitates were treated with (+) or without (-) DTT (75 mM) and  $\beta$ -ME (1.5%) or 0.5 M hydroxyl amine prior to immunoblotting analysis. (g) Undifferentiated (-) and differentiated (+) C2C12 cells were transfected with indicated plasmids and then harvested for co-IP analysis with the anti-Myc coupled agarose beads.

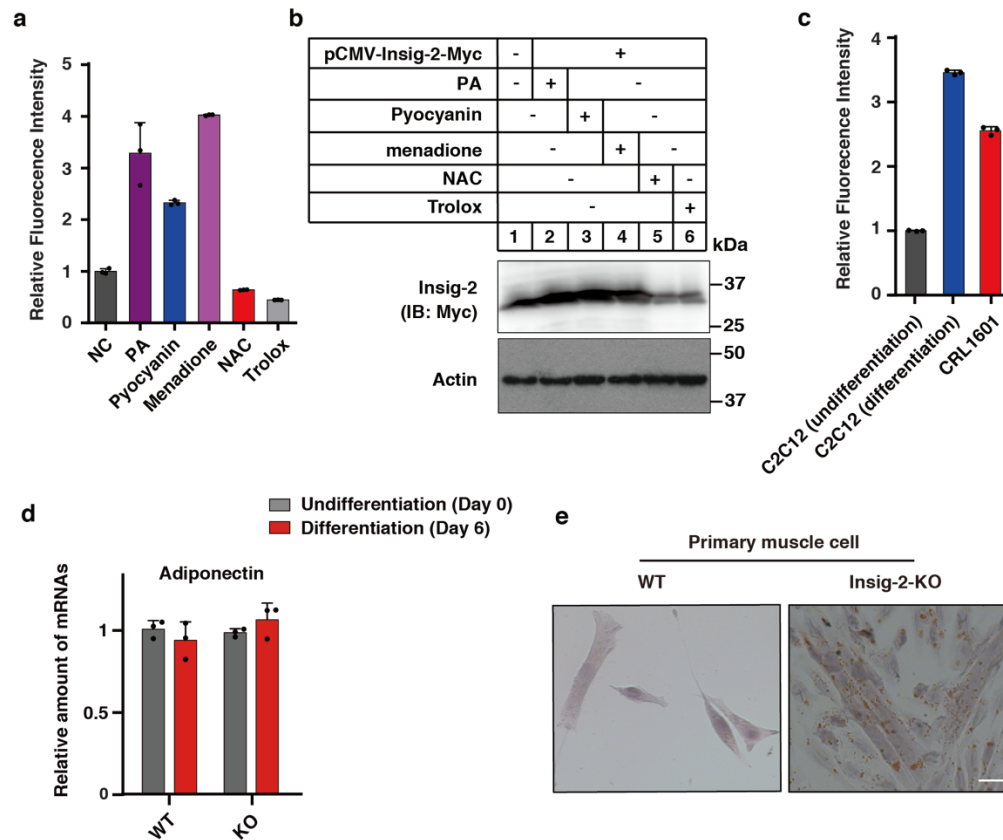

**Supplementary Figure 2. Insig-2 can be oxidized and stabilized by ROS and it prevents lipid accumulation in primary muscle cells.**

(a) The ROS levels of cells treated with three ROS inducers (PA, pyocyanin and menadione) and two scavengers (NAC and Trolox) as measured by dichlorofluorescein (DCF) (n=3 biologically independent samples per condition, bars in black). (b) Cells were treated with three ROS inducers (PA, pyocyanin and menadione) and two scavengers (NAC and Trolox). Then cells were harvested for immunoblotting analysis. (c) The ROS levels of CRL1601, undifferentiated and differentiated C2C12 cells as measured by DCF. Data are presented as mean  $\pm$  s.d. (n = 3 independent experiments). (d) The mRNA levels of Adiponectin in undifferentiated and differentiated WT and Insig-2 knock out cells (n=3 biologically independent samples per condition, bars in black). (e) Oil Red O staining of primary muscle cells from WT and *Insig-2*-KO mice. Scale bars, 20  $\mu$ m.

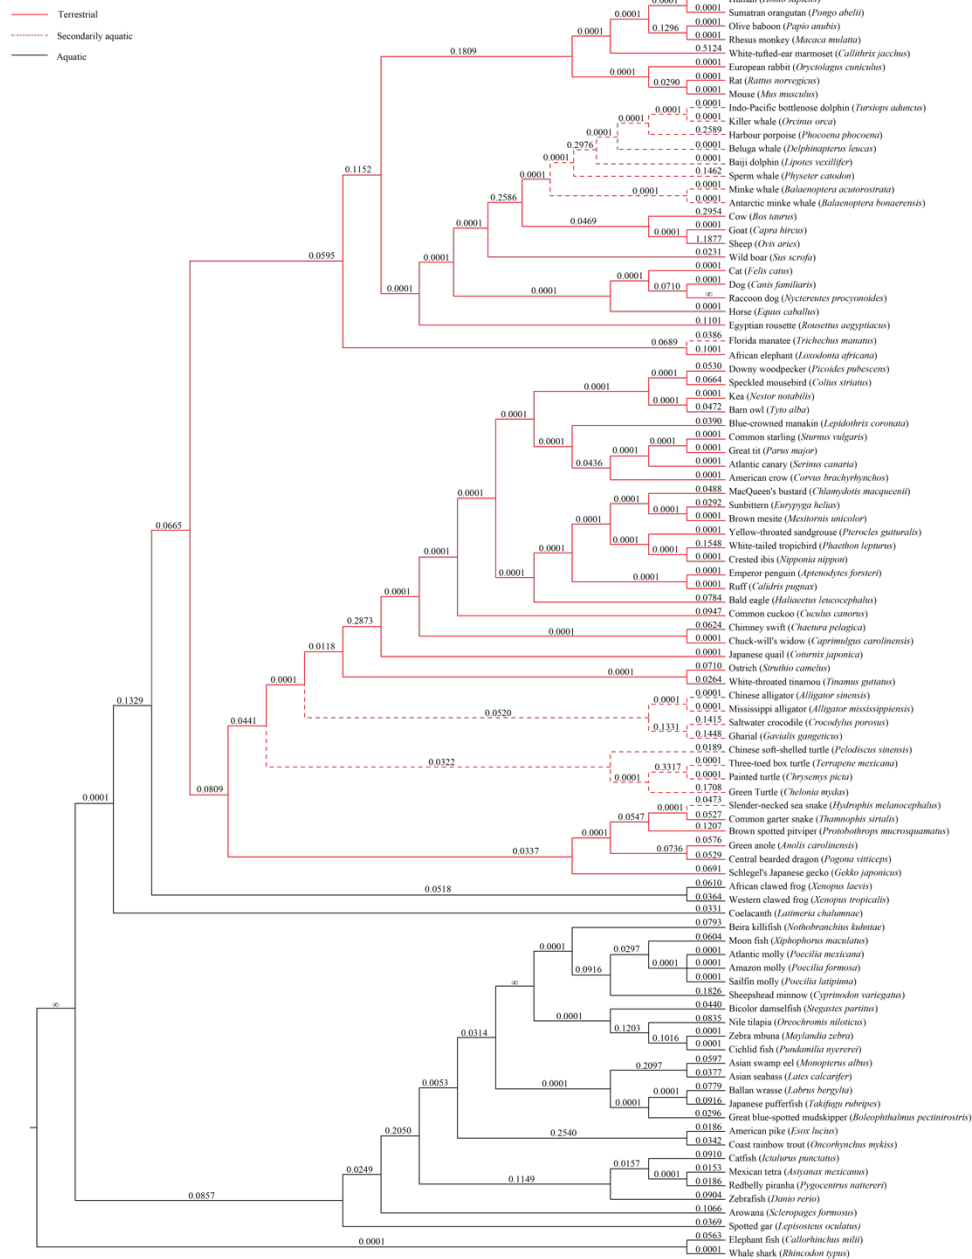

**Supplementary Figure 3. The Bayesian tree of Insig genes in animals showing the duplication event at the origin of vertebrates. Branch lengths are drawn to the scale, numbers at the nodes are Bayesian posterior probabilities as percentages.**

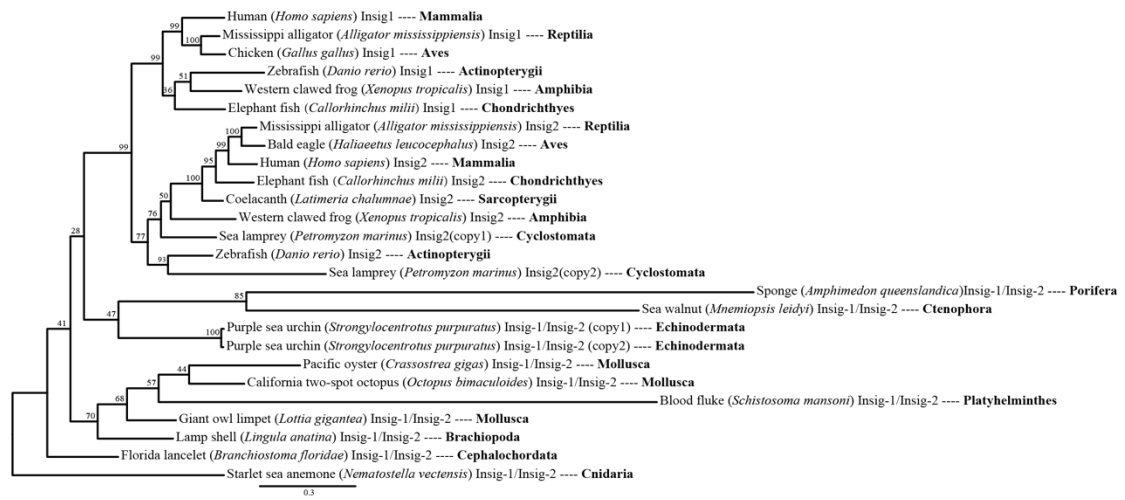

**Supplementary Figure 4. The results of the free-ratio model.** The phylogeny used here is the same as in the figure 6.  $\omega$  value for each branch was mapped to the phylogeny.  $\infty$  represents  $ds=0$  but  $dn \neq 0$ .

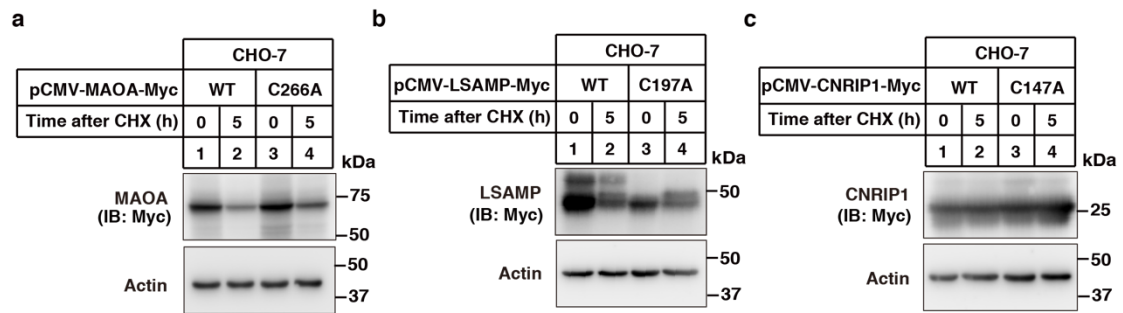

**Supplementary Figure 5. The cysteine of the YECK motif in MAOA, LSAMP and CNRIP1 did not affect their protein stability.**

(a-c) The Monoamine Oxidase A (MAOA), Limbic System Associated Membrane Protein (LSAMP) and Cannabinoid Receptor Interacting Protein 1 (CNRIP1) proteins have YECK motif. We made the expression plasmids encoding them or their C-to-A mutant proteins. CHO-7 cells were transfected with plasmids expressing the indicated proteins, and then treated without or with 100  $\mu$ M CHX for 5 h followed by immunoblotting analysis.

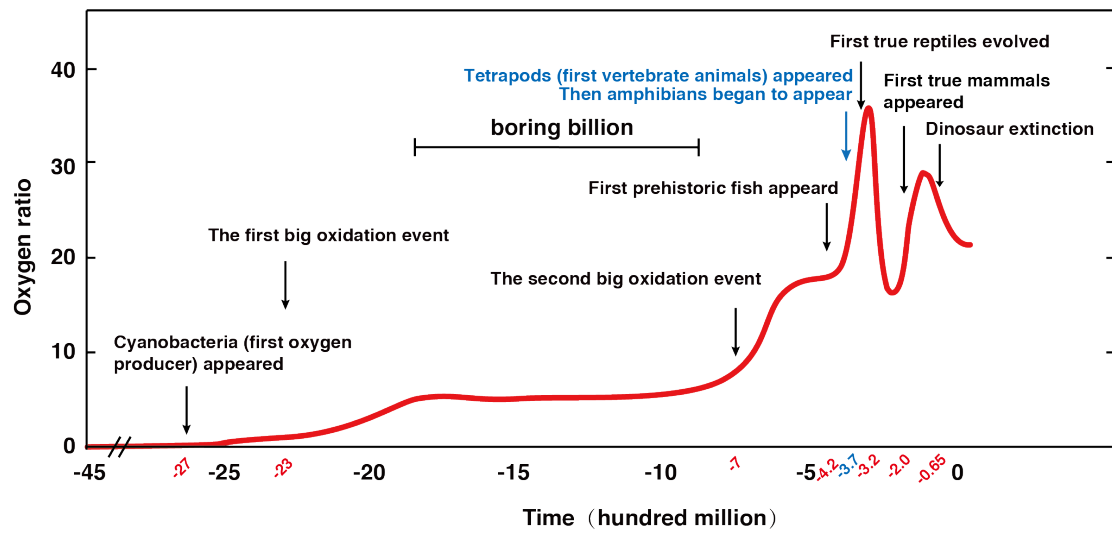

**Supplementary Figure 6. The atmospheric O<sub>2</sub> concentration and major evolutionary events from the ancient time to the present.**



**Supplementary Table 1.** GenBank accession numbers of *Insig-1* and *Insig-2* genes and information of genome and transcriptome assemblies at NCBI used for identifying the two genes.

| Accession numbers for vertebrate <i>Insig-2</i> genes |                                       |          |                |  |
|-------------------------------------------------------|---------------------------------------|----------|----------------|--|
| Common name                                           | Species name                          | Class    | Accession No.  |  |
| Human                                                 | <i>Homo sapiens</i>                   | Mammalia | NM_001321329.1 |  |
| Olive baboon                                          | <i>Papio anubis</i>                   |          | NM_001168911.1 |  |
| Rhesus monkey                                         | <i>Macaca mulatta</i>                 |          | XM_002799405.2 |  |
| White-tufted-ear marmoset                             | <i>Callithrix jacchus</i>             |          | XM_017973529.1 |  |
| Dog                                                   | <i>Canis familiaris</i>               |          | XM_848012.5    |  |
| African elephant                                      | <i>Loxodonta africana</i>             |          | XM_010596395.2 |  |
| Mouse                                                 | <i>Mus musculus</i>                   |          | NM_001357251.1 |  |
| Baiji dolphin                                         | <i>Lipotes vexillifer</i>             |          | XM_007456350.1 |  |
| Killer whale                                          | <i>Orcinus orca</i>                   |          | XM_004276497.2 |  |
| Goat                                                  | <i>Capra hircus</i>                   |          | NM_001285738.1 |  |
| Sheep                                                 | <i>Ovis aries</i>                     |          | XM_004004747.3 |  |
| Cow                                                   | <i>Bos taurus</i>                     |          | XM_024981026.1 |  |
| Raccoon dog                                           | <i>Nyctereutes procyonoides</i>       |          | HQ878328.1     |  |
| Egyptian rousette                                     | <i>Rousettus aegyptiacus</i>          |          | XM_016151389.1 |  |
| Cat                                                   | <i>Felis catus</i>                    |          | XM_003990710.5 |  |
| Horse                                                 | <i>Equus caballus</i>                 |          | XM_001488083.5 |  |
| Sumatran orangutan                                    | <i>Pongo abelii</i>                   |          | XM_024243812.1 |  |
| Wild boar                                             | <i>Sus scrofa</i>                     |          | NM_001129968.1 |  |
| Rat                                                   | <i>Rattus norvegicus</i>              |          | BC085682.1     |  |
| European rabbit                                       | <i>Oryctolagus cuniculus</i>          |          | XM_002712385.3 |  |
| Florida manatee                                       | <i>Trichechus manatus latirostris</i> |          | XM_004389679.2 |  |

---

|                            |                                 |          |                |
|----------------------------|---------------------------------|----------|----------------|
| Ostrich                    | <i>Struthio camelus</i>         | Aves     | XM_009677191.1 |
| White-throated tinamou     | <i>Tinamus guttatus</i>         |          | XM_010211730.1 |
| Japanese quail             | <i>Coturnix japonica</i>        |          | XM_015868738.1 |
| Ruff                       | <i>Calidris pugnax</i>          |          | XM_014939905.1 |
| Emperor penguin            | <i>Aptenodytes forsteri</i>     |          | XM_009290976.2 |
| American crow              | <i>Corvus brachyrhynchos</i>    |          | XM_008638221.2 |
| Great tit                  | <i>Parus major</i>              |          | XR_001522851.2 |
| Atlantic canary            | <i>Serinus canaria</i>          |          | XM_009087804.2 |
| Common starling            | <i>Sturnus vulgaris</i>         |          | XM_014871832.1 |
| Common cuckoo              | <i>Cuculus canorus</i>          |          | XM_009571512.1 |
| Yellow-throated sandgrouse | <i>Pterocles gutturalis</i>     |          | XM_010080588.1 |
| Chimney swift              | <i>Chaetura pelagica</i>        |          | XM_010001284.1 |
| Brown mesite               | <i>Mesitornis unicolor</i>      |          | XM_010182157.1 |
| Kea                        | <i>Nestor notabilis</i>         |          | XM_010020908.1 |
| Crested ibis               | <i>Nipponia nippon</i>          |          | XM_009461760.1 |
| Chuck-will's widow         | <i>Caprimulgus carolinensis</i> |          | XM_010176721.1 |
| Barn owl                   | <i>Tyto alba</i>                |          | XM_009969438.1 |
| Sunbittern                 | <i>Eurypyga helias</i>          |          | XM_010150819.1 |
| Blue-crowned manakin       | <i>Lepidothrix coronata</i>     |          | XM_017820922.1 |
| Bald eagle                 | <i>Haliaeetus leucocephalus</i> |          | XM_010575124.1 |
| White-tailed tropicbird    | <i>Phaethon lepturus</i>        |          | XM_010290335.1 |
| MacQueen's bustard         | <i>Chlamydotis macqueenii</i>   |          | XM_010120675.1 |
| Downy woodpecker           | <i>Picoides pubescens</i>       |          | XM_009904412.1 |
| Speckled mousebird         | <i>Colius striatus</i>          |          | XM_010204276.1 |
| Central bearded dragon     | <i>Pogona vitticeps</i>         | Reptilia | XM_020779611.1 |
| Schlegel's Japanese gecko  | <i>Gekko japonicus</i>          |          | XM_015406308.1 |

---

---

|                               |                                      |                |                |
|-------------------------------|--------------------------------------|----------------|----------------|
| Green anole                   | <i>Anolis carolinensis</i>           |                | XM_008109701.2 |
| Mississippi alligator         | <i>Alligator mississippiensis</i>    |                | XM_019480585.1 |
| Chinese alligator             | <i>Alligator sinensis</i>            |                | XM_006017890.3 |
| Brown spotted pitviper        | <i>Protobothrops mucrosquamatus</i>  |                | XM_015820283.1 |
| Common garter snake           | <i>Thamnophis sirtalis</i>           |                | XM_014055045.1 |
| Three-toed box turtle         | <i>Terrapene mexicana</i>            |                | XM_024224508.1 |
| Green Turtle                  | <i>Chelonia mydas</i>                |                | XM_007057044.1 |
| Chinese soft-shelled turtle   | <i>Pelodiscus sinensis</i>           |                | XM_006137623.2 |
| Painted turtle                | <i>Chrysemys picta</i>               |                | XM_005286822.3 |
| Gharial                       | <i>Gavialis gangeticus</i>           |                | XM_019522525.1 |
| Saltwater crocodile           | <i>Crocodylus porosus</i>            |                | XM_019554381.1 |
| Western clawed frog           | <i>Xenopus tropicalis</i>            | Amphibia       | NM_001011169.1 |
| African clawed frog           | <i>Xenopus laevis</i>                |                | NM_001094219.1 |
| Coelacanth                    | <i>Latimeria chalumnae</i>           | Sarcopterygii  | XM_014485595.1 |
| Sailfin molly                 | <i>Poecilia latipinna</i>            | Actinopterygii | XM_015022732.1 |
| Amazon molly                  | <i>Poecilia formosa</i>              |                | XM_007575256.2 |
| Moon fish                     | <i>Xiphophorus maculatus</i>         |                | XM_005815496.3 |
| Beira killifish               | <i>Nothobranchius kuhntae</i>        |                | HAEE01001557.1 |
| Sheepshead minnow             | <i>Cyprinodon variegatus</i>         |                | XM_015398436.1 |
| Bicolor damselfish            | <i>Stegastes partitus</i>            |                | XM_008279449.1 |
| Nile tilapia                  | <i>Oreochromis niloticus</i>         |                | XM_003456202.5 |
| Atlantic molly                | <i>Poecilia mexicana</i>             |                | XM_014990013.1 |
| Cichlid fish                  | <i>Pundamilia nyererei</i>           |                | XM_005751575.1 |
| Great blue-spotted mudskipper | <i>Boleophthalmus pectinirostris</i> |                | XM_020933260.1 |
| Ballan wrasse                 | <i>Labrus bergylta</i>               |                | XM_020635481.1 |
| Asian seabass                 | <i>Lates calcarifer</i>              |                | XM_018696620.1 |

---

|                     |                              |                |                |
|---------------------|------------------------------|----------------|----------------|
| Asian swamp eel     | <i>Monopterus albus</i>      |                | XM_020606606.1 |
| Japanese pufferfish | <i>Takifugu rubripes</i>     |                | XM_011613800.1 |
| Zebrafish           | <i>Danio rerio</i>           |                | BC162666.1     |
| Catfish             | <i>Ictalurus punctatus</i>   |                | NM_001201086.2 |
| Mexican tetra       | <i>Astyanax mexicanus</i>    |                | XM_007261051.3 |
| Redbelly piranha    | <i>Pygocentrus nattereri</i> |                | XM_017692226.1 |
| American pike       | <i>Esox lucius</i>           |                | XM_010880216.3 |
| Coast rainbow trout | <i>Oncorhynchus mykiss</i>   |                | XM_021597675.1 |
| Arowana             | <i>Scleropages formosus</i>  |                | XM_018732277.1 |
| Spotted gar         | <i>Lepisosteus oculatus</i>  |                | XM_015358639.1 |
| Zebra mbuna         | <i>Maylandia zebra</i>       |                | XM_004571956.2 |
| Elephant fish       | <i>Callorhynchus milii</i>   | Chondrichthyes | XM_007896172.1 |
| Whale shark         | <i>Rhincodon typus</i>       |                | XM_020532577.1 |

**Accession numbers for vertebrate *Insig-1* genes**

| Common name           | Species name                      | Class          | Accession No.  |
|-----------------------|-----------------------------------|----------------|----------------|
| Human                 | <i>Homo sapiens</i>               | Mammalia       | NM_001346591.1 |
| Mississippi alligator | <i>Alligator mississippiensis</i> | Reptilia       | XM_006275067.3 |
| Zebrafish             | <i>Danio rerio</i>                | Actinopterygii | NM_199869.1    |
| Elephant fish         | <i>Callorhynchus milii</i>        | Chondrichthyes | XM_007884440.1 |
| Western clawed frog   | <i>Xenopus tropicalis</i>         | Amphibia       | XM_012964967.2 |
| Chicken               | <i>Gallus gallus</i>              | Aves           | NM_001030966.1 |

**Genome assemblies used to identify *Insig-2* genes**

| Common name | Species name                      | Class    | Assembly ID     | Scaffold       | Start   | End     |
|-------------|-----------------------------------|----------|-----------------|----------------|---------|---------|
| Minke whale | <i>Balaenoptera acutorostrata</i> | Mammalia | GCA_000493695.1 | NW_006725565.1 | 4972494 | 4960890 |

|                                 |                                 |          |                 |                |          |          |
|---------------------------------|---------------------------------|----------|-----------------|----------------|----------|----------|
| Antarctic minke whale           | <i>Balaenoptera bonaerensis</i> |          | GCA_000978805.1 | DF407697.1     | 1710     | 13242    |
| Beluga whale                    | <i>Delphinapterus leucas</i>    |          | GCA_002288925.2 | NW_019160898.1 | 11223653 | 11212392 |
| Harbour porpoise                | <i>Phocoena phocoena</i>        |          | GCA_003071005.1 | PKGA01141833.1 | 2065978  | 2077444  |
| Sperm whale                     | <i>Physeter catodon</i>         |          | GCA_900411695.1 | NW_019873604.1 | 5441934  | 5453423  |
| Indo-Pacific bottlenose dolphin | <i>Tursiops aduncus</i>         |          | GCA_003227395.1 | NCQN01000653.1 | 398673   | 387374   |
| slender-necked sea snake        | <i>Hydrophis melanocephalus</i> | Reptilia | GCA_004320005.1 | BHFS01009993.1 | 5048     | 13767    |

**Genome and transcriptome assemblies used to identify *Insig-1/Insig-2* gene.**

| Common name                     | Species name                         | Phylum          | Assembly ID     | Scaffold       | Start    | End      |
|---------------------------------|--------------------------------------|-----------------|-----------------|----------------|----------|----------|
| Purple sea urchin               | <i>Strongylocentrotus purpuratus</i> | Echinodermata   | GCA_000002235.3 | NW_011992292.1 | 5206     | 9925     |
|                                 |                                      |                 |                 | NW_011968172.1 | 188936   | 185481   |
| Pacific oyster                  | <i>crassostrea gigas</i>             | Mollusca        | GCA_000297895.1 | NW_011935183.1 | 372958   | 380017   |
| Giant owl limpet                | <i>Lottia gigantea</i>               | Mollusca        | GCA_000327385.1 | NW_008710566.1 | 780987   | 785179   |
| California two-spot octopus     | <i>Octopus bimaculoides</i>          | Mollusca        | GCA_001194135.1 | NW_014655479.1 | 83350    | 77766    |
| Sea walnut                      | <i>Mnemiopsis leidyi</i>             | Ctenophora      | GCA_000226015.1 | JH153334.1     | 192047   | 187117   |
| Starlet sea anemone             | <i>Nematostella vectensis</i>        | Cnidaria        | GCA_000209225.1 | NW_001834356.1 | 898854   | 901029   |
| Lamp shell                      | <i>Lingula anatina</i>               | Brachiopoda     | GCA_001039355.2 | NW_019775336.1 | 343857   | 341715   |
| Blood fluke                     | <i>Schistosoma mansoni</i>           | Platyhelminthes | GCA_000237925.2 | NC_031498.1    | 26028045 | 26027260 |
| Sponge                          | <i>Amphimedon queenslandica</i>      | Porifera        | GCA_000090795.1 | NW_003546250.1 | 169942   | 168648   |
| Sea lamprey                     | <i>Petromyzon marinus</i>            | Cyclostomata    | GCA_002833325.1 | PIZI01000005.1 | 7494194  | 7478459  |
|                                 |                                      |                 |                 | PIZI01000047.1 | 202581   | 206411   |
| Florida lancelet                | <i>Branchiostoma floridae</i>        | Cephalochordata | GCA_000003815.1 | NW_003101522.1 | 917404   | 915587   |
| Sea squirt ( <b>Not found</b> ) | <i>Ciona intestinalis</i>            | Tunicata        | GCA_000224145.2 |                |          |          |

**Supplementary Table 2.** Likelihood ratio tests of selective pressures on vertebrate *Insig-2* gene.

| Model                | $\omega$ value              |            |                     | $\ln L$    | Models compared | $2\Delta (\ln L)$ | P value      |
|----------------------|-----------------------------|------------|---------------------|------------|-----------------|-------------------|--------------|
|                      | $\omega_0$                  | $\omega_1$ | $\omega_2/\omega_f$ |            |                 |                   |              |
| <b>A: Free-ratio</b> | Variable $\omega$ by branch |            |                     | -11551.498 |                 |                   |              |
| <b>B: One-ratio</b>  | 0.053                       |            |                     | -11667.120 | A vs. B         | 231.244           | <b>0.008</b> |
| <b>C: Two-ratio</b>  | 0.058                       | 0.046      |                     | -11665.385 | B vs. C         | 3.470             | 0.062        |
| <b>D: M2a_rel</b>    | 0.016 (83.4%)               | 1 (1.1%)   | 0.230 (15.5%)       | -11421.236 |                 |                   |              |
| <b>E: CmC</b>        | 0.017 (83.7%)               | 1 (1.0%)   | 0.283 (15.3%)       | -11415.937 | D vs. E         | 10.598            | <b>0.001</b> |
|                      |                             |            | Terrestrial: 0.169  |            |                 |                   |              |

Note-  $\omega_f$  is the divergent site class that has a separate  $\omega$  value.
